# Supplementary material
Source: publisher figshare collection journal article supplement (https://rs.figshare.com/ndownloader/files/23778596)
Supplement: Supplementary file 1 [file 23778596]

## Sheet: Table S1 Sedimentation Rates
Table S1: Barents Sea sedimentation rates adapted and extended from Pathirana et al. 2014
Core	Latitude	Longitude	Water Depth (m)	LSR (cm/kyr)	Reference1)	Label in figure 32)
1	75.6667	30.1667	345	50	Zaborska et al. 2008	A
1a	77.6333	25.8333	173	70	Zaborska et al. 2008	B
2	78.2167	27.3	320	60	Zaborska et al. 2008	C
2a	79.005	25.6167	215	60	Zaborska et al. 2008	D
3	79.0167	25.4667	198	80	Zaborska et al. 2008	E
4	77.0167	29.4833	222	30	Zaborska et al. 2008	F
5a	76.3833	22.1667	200	130	Zaborska et al. 2008	G
8	81.3333	27.3167	503	100	Zaborska et al. 2008	H
10	79.3667	28.7	303	60	Zaborska et al. 2008	I
11	79.8167	29.7333	195	30	Zaborska et al. 2008	J
12	80.15	29.6	286	50	Zaborska et al. 2008	K
16	77.0833	28.55	206	30	Zaborska et al. 2008	L
17	77.4333	40.3	208	70	Zaborska et al. 2008	M
18	75.6667	31.8167	340	130	Zaborska et al. 2008	N
R1MC85	70.46	21.68	466	210	Jensen et al. 2007	O
St1245	77.5	19.13	180	184	Winkelmann and Knies 2005	P
BASICC 1	73.1	25.63	425	110	Vare et al. 2010	Q
BASICC 8	77.98	26.8	135	110	Vare et al. 2010	R
POW-1	73.1333	25.6333	425	60	Maiti et al. 2010	S
MIC-4	75.0033	26.2167	218	100	Maiti et al. 2010	T
PIC-8	77.9833	26.8333	136	100	Maiti et al. 2010	U
23258-3	75	14	1768	20.2	Sarnthein et al. 2003	V
23258-2	75	14	1768	39.1	Sarnthein et al. 2003	W
JM02-460CG	76.05	15.73	389	30.5	Rasmussen et al. 2007	X
JM02-460PC	76.05	15.73	389	35.7	Rasmussen et al. 2007	Y
JM03-373PC	76.28	13.28	1485	30.7	Rasmussen et al. 2007	Z
PSh-5159N	71.36	22.65	422	10.9	Risebrobakken et al. 2010	AA
JM05-085GC	71.62	22.93	408	13.4	Juntilla et al. 2010	BB
JM07-01	70.5	21.5	440	23.3	Juntilla et al. 2010	CC
JM07-02	71.16	23	402	94.4	Juntilla et al. 2010	DD
JM09-KA03	72.74	16.2	427	10.8	Rüther et al. 2011	EE
JM08-0309	72.49	17.01	385	4	Rüther et al. 2011	FF
JM07-09	72.33	17.51	378	14.7	Rüther et al.. 2011	GG
JM08-0306	72.99	19.52	416	14.4	Rüther et al.. 2011	HH
VM55	72.04	17.74	292	5.2	Pathirana et al. 2014	II
VM73	72.08	18.28	310	7.4	Pathirana et al. 2014	JJ
06JM-012	71.62	22.93	432	39	Pathirana et al. 2014	KK
St20	74.82	18.02	296	63	Pathirana et al. 2014	LL
R87MC006	71.31	20.32	240	4	Pathirana et al. 2014	MM
SB-3	76.5833	20	86	190	Heldal et al. 2002	NN
112	71.2956	22.5263	421	70	Boitsov et al. 2009	OO
102	71.262	21.1723	279	100	Boitsov et al. 2010	PP
153	71.3188	22.4928	435	120	Boitsov et al. 2011	QQ
1) References:	Boitsov S, Jensen HK, Klungsoyr J. Natural background and anthropogenic inputs of polycyclic aromatic hydrocarbons (PAH) in sediments of South-Western Barents Sea. Mar Environ Res. 2009;68(5):236-45.
	Heldal HE, Varskog P, Foyn L. Distribution of selected anthropogenic radionuclides (137Cs, 238Pu, (239,240)Pu and 241Am) in marine sediments with emphasis on the Spitsbergen-Bear Island area. Sci Total Environ. 2002;293(1-3):233-45.
	Jensen, H.B., Knies, J., Finne, T.E., Thorsnes, T., 2006. Mareano 2006 – miljøgeokjemiske resultater fra Tromsøflaket, Ingøy-djupet, Lopphavet og Sørøysundet Geological Survey of Norway, Trondheim.
	Junttila, J., Aagaard-Sørensen, S., Husum, K., Hald, M., 2010. Late Glacial–Holocene clay minerals elucidating glacial history in the SW Barents Sea. Marine Geology 276, 71-85.
	Maiti, K., Carroll, J., Benitez-Nelson, C.R., 2010. Sedimentation and particle dynamics in the seasonal ice zone of the Barents Sea. Journal of Marine Systems 79, 185-198.
	Pathirana, I., Knies, J., Felix, M., Mann, U., 2014. Towards an improved organic carbon budget for the western Barents Sea shelf. Climate of the Past 10, 569-587.
	Rasmussen, T.L., Thomsen, E., Ślubowska, M.A., Jessen, S., Solheim, A., Koç, N., 2007. Paleoceanographic evolution of the SW Svalbard margin (76°N) since 20,000 14C yr BP. Quaternary Research 67, 100-114.
	Risebrobakken, B., Moros, M., Ivanova, E.V., Chistyakova, N., Rosenberg, R., 2010. Climate and oceanographic variability in the SW Barents Sea during the Holocene. The Holocene 20, 609-621.
	Rüther, D.C., Mattingsdal, R., Andreassen, K., Forwick, M., Husum, K., 2011. Seismic architecture and sedimentology of a major grounding zone system deposited by the Bjørnøyrenna Ice Stream during Late Weichselian deglaciation. Quaternary Science Reviews 30, 2776-2792.
	Sarnthein, M., Van Kreveld, S., Erlenkeuser, H., Grootes, P.M., Kucera, M., Pflaumann, U., Schulz, M., 2003. Centennial-to-millennial-scale periodicities of Holocene climate and sediment injections off the western Barents shelf, 75 degrees N. Boreas 32, 447-461.
	Vare, L.L., Massé, G., Belt, S.T., 2010. A biomarker-based reconstruction of sea ice conditions for the Barents Sea in recent centuries. The Holocene 20, 637-643.
	Winkelmann, D., Knies, J., 2005. Recent distribution and accumulation of organic carbon on the continental margin west off Spitsbergen. Geochemistry, Geophysics, Geosystems 6.
	Zaborska, A., Carroll, J., Papucci, C., Torricelli, L., Carroll, M.L., Walkusz-Miotk, J., Pempkowiak, J., 2008. Recent sediment accumulation rates for the Western margin of the Barents Sea. Deep Sea Research Part II: Topical Studies in Oceanography 55, 2352-2360.
2) Grey marking indicates location north of the median sea ice extent (Fig. 2).

## Sheet: Table S2 Core Location
Table S2: Sampling locations shown in Figure 1
Sediment Core	Latitude	Longitude	Water depth (m)
B1-E3	70.7666	20.0005	192
B2-E14	71.7002	19.666	254
B3-E379	72.6333	19.25	364
B4-E26	73.3683	18.9205	470
B6-E40	75.1835	17.5374	141
B7-E44	76.0003	16.8333	320
B9-E55	76.0007	13.6666	1029
B10-E63	76.0003	10.667	2260
B11-E84	76.3663	20.9963	228
B13-E102	74.5	30.0008	359
B14-E292	76.4991	30.4973	393
B15-E146	78.2515	30.0085	317
B16-E183	80.1197	30.0668	283
B17-E225	81.28	29.3274	340
B18-E251	81.7529	29.9538	2963

## Sheet: Table S3 Elemental Composition
Table S3: Elemental composition and Corg/Ninorg, CaCO3 and δ13Corg (‰)
Sample ID	Corg/Ninorg	δ13Corg (‰)	CaCO3	Si (%)	Al (%)	Fe (%)	Ti (%)	Mg (%)	Ca (%)	Na (%)	K (%)	Mn (%)	P (%)	Zr (ppm)	Y (ppm)	Sr (ppm)	Rb (ppm)	Pb (ppm)	Cr (ppm)	V (ppm)	As (ppm)	Ba (ppm)	Zn (ppm)	Cu (ppm)	Ni (ppm)	Co (ppm)
B1	6	-	-	30.1522	4.53567	2.34659	0.271278	0.955914	6.66815	1.95851	1.12072	0.0662163	0.0456059	148.5	18.5	341	38	16	48.5	64	4.5	277	33	1.5	15	7.5
B2	6.77778	-	-	21.0208	4.23929	2.48997	0.264983	1.17001	11.3137	2.69666	1.49844	0.0968075	0.0656812	119	17	577.5	64.5	35	57	84.5	10	315.5	59	14	30.5	12.5
B3	7.59873	-	-	30.4327	5.45789	2.50221	0.324035	0.9921	2.77125	2.47781	1.89692	0.0681525	0.0667723	205.5	18.75	249	71	21.5	70.25	90.25	12.25	497.75	49.5	9	24.25	9.75
B4	8.52941	-	-	32.237	5.47509	2.75575	0.31834	1.02527	1.2543	1.96222	1.80145	0.0363996	0.0752825	218.5	19	155	69.5	17	76.5	117.5	14.5	474	50.5	5.5	25.5	8
B6	7.61818	-	-	23.7693	4.72356	2.98657	0.30635	1.17001	8.50493	1.8732	1.43203	0.0294295	0.0912118	192	19	436.5	58	16	64.5	103	20.5	288	44	8	21.5	5.5
B7	8.31513	-	-	26.4314	6.71618	4.25953	0.432846	1.44442	1.50802	2.88584	2.02559	0.0968075	0.163003	193.5	24	160	88	25.5	94	167.5	44.5	400	70	15.5	35.5	11
B9	8.29464	-	-	28.432	5.3957	2.87466	0.357907	1.10367	4.50976	2.16252	1.73919	0.0906118	0.0855383	220	21	298	70.5	20.5	72.5	105.5	16	497.5	53	16	29	11.5
B10	6.83673	-	-	17.356	5.47774	3.70348	0.378291	1.41728	12.0606	2.94147	1.78899	0.188581	0.0796466	117	20.5	660	82	25	65.5	131	17	517	72.5	31.5	38.5	18
B11	8.53763	-	-	25.9242	7.63178	4.32597	0.466719	1.36301	1.11136	2.76343	2.25804	0.0499527	0.108669	180.5	27	146	99.5	27	108	203.5	24.5	401.5	74	17.5	40	11.5
B13	7.57798	-21.6	1.77926	26.6815	6.93582	3.8696	0.429399	1.48363	1.06848	3.29015	2.2186	0.0470484	0.0993947	174.5	21	166.5	96.75	29.5	109.25	166.5	16.5	484	86.75	15.75	42.5	13.75
B14	7.78754	-21.35	0.769434	23.9458	6.78102	5.27195	0.434495	1.53489	0.793317	4.02274	2.21238	0.128173	0.232394	170.5	22.25	168.25	96.5	26	106	214.25	69.25	455	89.25	20	42	14.25
B15	7.63964	-23.08	1.34204	23.7086	7.7588	5.31042	0.495645	1.56504	0.746862	3.36804	2.41577	0.554707	0.158966	163	27.25	173.25	117.25	24.5	114.25	311.75	65.75	496.25	112.5	21.5	67	21.25
B16	6.5443	-21.94	3.87954	23.7833	7.46375	5.53074	0.437043	1.8093	1.3222	3.29571	2.75198	0.442991	0.173586	156.5	24.5	184.5	167	35	93	228.25	58	490.5	104	18	40.75	22
B17	6.65632	-22.0094	3.2285	23.6793	7.25866	4.95721	0.434795	1.80327	1.3079	3.65366	2.56104	0.83661	0.142382	155.5	23.5	177	130.75	42	90	201.5	45.25	498	90.75	20.5	49.75	25
B18	7.5492	-	-	22.0036	7.44522	4.69667	0.456976	1.69773	3.695	3.43852	2.39501	0.212589	0.10365	145.5	24	278.75	111.25	39.5	95.25	194.5	28.25	488.75	88.75	32.5	44	21.25
Note: The inorganic composition for stations B3, B13-B18 were analysed in a 0.5 cm interval. To aid comparison with other surface sediment investigation of the Barents Sea here we provide the average concentrations of the first centimetre.

## Sheet: Table S4 and S5 Grain Size
Table S4: Grain size distribution of decarbonated sediment samples
Station	<2 µm	2-63 µm	63-125 µm	125-250 µm	250-500 µm	500-1000 µm
B1	9.12333	59.6936	83.9014	98.6101	100	100
B2	8.97543	80.1176	95.0185	100	100	100
B3	7.42456	76.9137	93.1734	99.3836	100	100
B4	7.38282	85.0972	97.8401	99.9084	100	100
B6	7.9428	88.1197	98.3246	99.7005	99.7728	100
B7	5.60718	79.2352	94.2354	99.067	99.4162	100
B9	5.95728	80.9219	96.9501	100	100	100
B10	8.43323	79.6366	92.8348	99.636	100	100
B11	4.9199	70.5099	91.314	97.8154	98.8002	100
B13	6.53444	78.4342	93.4204	98.6257	99.7772	100
B14	7.43651	83.0938	95.7339	99.45	100	100
B15	7.05876	80.7632	94.8953	99.3095	99.9789	100
B16	8.72634	92.8067	99.1615	99.9727	100	100
B17	8.12845	93.3525	99.3027	100	100	100
B18	10.2253	83.4671	94.8022	100	100	100
Table S5: Grain size distribution of bulk sediment samples
Station	<2 µm	2-63 µm	63-125 µm	125-250 µm	250-500 µm	500-1000 µm
B1	2.80499	26.6455	39.3449	59.2291	80.1956	100
B2	8.56924	76.8323	85.9037	93.9489	97.6795	100
B3	6.07637	50.2511	73.8434	93.7292	97.9149	100
B4	5.95339	61.4014	72.3729	89.4677	97.2103	100
B6	2.83438	40.776	61.1581	80.0041	91.4707	100
B7	8.12742	91.3189	97.3247	99.3164	99.9809	100
B9	7.08151	62.8655	75.1465	90.8749	98.6744	100
B10	13.0602	97.8523	99.7634	99.9722	100	100
B11	4.95274	73.3578	83.3882	93.7852	98.7414	100
B13	6.79381	77.3753	84.217	91.5091	96.3187	100
B14	7.17044	87.0947	93.0229	95.7573	97.3758	100
B15	10.0549	87.9458	91.6152	95.8975	98.756	100
B16	8.01161	82.1156	86.5731	90.0868	93.52	100
B17	9.49301	94.2486	97.8939	99.1811	99.7526	100
B18	9.65871	94.9216	97.1752	97.697	98.5663	100

## Sheet: Table S6 OC-Fe
Table S6: Results of the OC-Fe analysis
		Organic Carbon (%)			Fe (%)
Sample	Core Depth	Initial	Control	After	Reactive	Initial	OC bond to FeR (%)1)	OC-FeR of TOC (%)	OC:Fe
B1	0-1 cm	0.3544	0.335665	0.236807	0.120161	2.30812	0.101767	28.7152	3.93785
B2	0-1 cm	0.9151	0.852444	0.650616	0.280747	2.3291	0.195566	21.371	3.23887
B3	0-0.5 cm	0.8112	0.744176	0.660574	0.34286	2.455	0.0806407	9.94091	1.09359
B3	0.5-1 cm	0.7594	0.724369	0.59265	0.380838	2.2032	0.133673	17.6024	1.63199
B4	0-1 cm	1.015	1.07784	0.856362	0.595066	2.79073	0.213539	21.0383	1.66851
B6	0-1 cm	1.676	1.59689	1.45011	0.455279	2.84668	0.14544	8.6778	1.48533
B7	0-1 cm	1.979	1.97331	1.76902	1.01444	4.18959	0.204944	10.3559	0.939347
B9	0-1 cm	0.9294	0.872067	0.757855	0.472755	2.79772	0.108355	11.6586	1.06569
B10	0-1 cm	1.005	0.734579	0.627714	0.569153	3.65802	0.107483	10.6948	0.878064
B11	0-1 cm	2.382	2.56729	2.03858	0.848268	4.36444	0.514403	21.5954	2.81959
B13	0-0.5 cm	1.8036	1.61675	1.08605	1.31247	3.99375	0.524868	29.1011	1.85941
B13	0.5-1 cm	1.9016	1.43367	1.1251	1.19336	3.9308	0.304917	16.0348	1.18802
B14	0-0.5 cm	2.323	2.07669	1.69307	1.57173	4.83306	0.390807	16.8234	1.15612
B14	0.5-1 cm	2.6381	2.09408	1.74217	1.53593	5.00092	0.340501	12.907	1.03077
B15	0-0.5 cm	1.7231	1.39541	1.04625	1.69681	5.14081	0.341984	19.847	0.937106
B15	0.5-1 cm	1.7462	1.50426	1.14958	1.71129	5.30168	0.358226	20.5146	0.973306
B16	0-0.5 cm	1.64919	1.49483	1.00446	1.81115	5.49053	0.490364	29.7336	1.25887
B16	0.5-1 cm	1.6446	1.47355	1.05169	1.74952	5.43457	0.417373	25.3784	1.10923
B17	0-0.5 cm	1.694	1.6295	1.1528	1.33164	5.09185	0.473236	27.936	1.65237
B17	0.5-1 cm	1.719	1.74658	1.08167	1.3853	4.81208	0.656042	38.1642	2.20193
B18	0-0.5 cm	1.48	1.58679	1.20227	0.931193	4.67919	0.391339	26.4418	1.95402
B18	0.5-1 cm	1.593	1.72563	1.15283	1.01598	4.44837	0.584975	36.7216	2.67711
1) OC-Fe (%) = 100·(OCcontrol - OCafter)·(Mcontrol/ Msample)/(OCinitial)
OC-Fe (%) = Percentage of OC attached to iron.
TOCcontrol = Total organic carbon (mg) after the control extraction.
TOCafter = Total organic carbon (mg) after the reduction extraction.
TOCinitial = Total organic carbon (mg) in the bulk sediment.
Mcontrol = Mass before the control extraction.
Msample = Mass before the reduction extraction.

## Sheet: Table S7 Carbon AR
Table S7: Organic carbon accumulation rates
						Porosity	0.77	Density (g/cm3)	1.85
Region	Corg (%)	Corg (mg/g)	Sedimention rate (cm/yr)	MAR1 (g m-2 yr-1)	Corg AR (gC m-2 yr-1)
North of the median winter sea ice extent	1.87	18.7	0.0789	335.719	6.27795		1
South of the median winter sea ice extent	1.03	10.3	0.0538	228.919	2.35787		2
1MAR = Mass Accumulation Rate: Linear sedimentation rates (Fig. 2) were converted to MARs with the following equation: %OC x SR x (porosity-1) x bulk density; where, SR is the sedimentation rate in cm yr‐1, porosity is assumed to be 0.77 and bulk density is assumed to be 1.85 g cm-3
